# Supplementary material
Source: HighWire-hosted journal article supplement (https://jnnp.bmj.com/content/jnnp-2023-332104)
Supplement: inline-supplementary-material-1 [file inline-supplementary-material-1.pdf]

## SUPPLEMENTARY FILE

### Chelune formula

Raw test scores were converted to a Reliable Change Index (RCI) with the Chelune formula that takes measurement errors and practice effects into account (equation 1).

(1)

$$RCI = \frac{(X_2 - X_1) - (\bar{X}_{C2} - \bar{X}_{C1})}{SE_{diff}}$$

$X_1$  and  $X_2$  denote individual test scores measured at baseline and follow-up, respectively.  $\bar{X}_{C1}$  and  $\bar{X}_{C2}$  denote mean test scores from the control group, at baseline and follow-up, respectively.

$SE_{diff}$  denotes the standard error of the difference score, calculated by equation 2:

(2)

$$SE_{diff} = \sqrt{2s_1^2(1 - r_{12})}$$

$r_{12}$  denotes test-retest reliability in the control group and  $s_1$  denotes the standard deviation of the baseline score in the control group.

**Supplementary Table 1 Baseline characteristics of the study population and patients who only completed a baseline assessment.**

|                                             | Baseline and follow-up assessment completed (n=393) | Only baseline assessment completed (n=205) | P value |
|---------------------------------------------|-----------------------------------------------------|--------------------------------------------|---------|
| Median age at index event, years (IQR)      | 44.3 (38.4-47.2)                                    | 44.5 (38.4-47.6)                           | 0.787   |
| Men, N (%)                                  | 198 (50.4)                                          | 113 (55.1)                                 | 0.271   |
| Median time to assessment BL, days (IQR)    | 80 (54-114)                                         | 89 (60-126)                                | 0.026*  |
| Median education level (IQR)                | 5 (5-6)                                             | 5 (5-6)                                    | 0.034*  |
| Median NIHSS score at admission (IQR)       | 2 (1-5)                                             | 3 (1-5)                                    | 0.010*  |
| Median NIHSS score at discharge (IQR)       | 1 (0-2)                                             | 1 (0-2)                                    | 0.070   |
| Barthel Index good outcome (BI≥85), N (%)   | 367 (97.9)                                          | 185 (93.9)                                 | 0.014*  |
| mRS good outcome (mRS 0-1), N (%)           | 257 (67.6)                                          | 121 (61.7%)                                | 0.158   |
| MINI- symptoms of depression present, N (%) | 37 (9.7)                                            | 18 (9.0)                                   | 0.788   |
| Mean CIS-20R-fatigue severity (SD)          | 33.0 (11.8)                                         | 32.6 (12.2)                                | 0.676   |
| TOAST, N (%)                                |                                                     |                                            | 0.134   |
| Atherothrombotic                            | 12 (3.1)                                            | 13 (6.3)                                   |         |
| Likely atherothrombotic                     | 40 (10.2)                                           | 30 (14.6)                                  |         |
| Small vessel disease                        | 55 (14.0)                                           | 30 (14.6)                                  |         |
| Cardioembolic                               | 70 (17.8)                                           | 27 (13.2)                                  |         |
| Rare causes                                 | 85 (21.6)                                           | 39 (19.0)                                  |         |
| Multiple causes                             | 28 (7.1)                                            | 9 (4.4)                                    |         |
| Cryptogenic                                 | 103 (26.2)                                          | 57 (27.8)                                  |         |
| Vascular risk factors, N (%)                |                                                     |                                            |         |
| Hypertension                                | 145 (36.9)                                          | 79 (38.5)                                  | 0.694   |
| Diabetes mellitus                           | 32 (8.1)                                            | 23 (11.2)                                  | 0.277   |
| Dyslipidemia                                | 249 (63.4)                                          | 143 (69.8)                                 | 0.118   |
| Obesity                                     | 51 (13.0)                                           | 27 (13.2)                                  | 0.947   |
| Morbid obesity                              | 24 (6.1)                                            | 8 (3.9)                                    | 0.256   |
| Alcohol                                     | 22 (5.6)                                            | 12 (5.9)                                   | 0.898   |
| Cognitive impaired at baseline, N (%)       |                                                     |                                            |         |
| Episodic memory                             | 76 (19.5)                                           | 49 (24.4)                                  | 0.173   |
| Processing speed                            | 108 (27.6)                                          | 68 (33.8)                                  | 0.118   |
| Visuoconstruction                           | 129 (34.1)                                          | 81 (42.2)                                  | 0.059   |
| Executive functioning                       | 26 (6.6)                                            | 19 (9.3)                                   | 0.236   |
| Visual neglect                              | 1 (0.5)                                             | 2 (0.5)                                    | 1.000   |
| Language deficits                           | 40 (20.8)                                           | 66 (17.5)                                  | 0.335   |
| Attention and working memory                | 19 (5.0)                                            | 12 (6.2)                                   | 0.547   |

Education category 5, i.e. middle school / secondary vocational training. IQR: interquartile range; NIHSS: National Institutes of Health Stroke Scale; MINI: Mini International Neuropsychiatric Interview; CIS-20R: Checklist Individual Strength; TOAST: Trial of ORG 10172 in Acute Stroke Treatment.

\* indicates significant P values (p<0.05).

Missing data in patients with only baseline assessment completed: Barthel Index 8 (3.9%); mRS 9 (4.4%); MMSE 5 (2.4%); MINI - symptoms of depression 6 (1.5%); CIS-20R-fatigue 47 (22.9%); Cognitive impaired: Episodic memory 4 (2.0%); Processing speed 4 (2.0%); Visuoconstruction 13 (6.3%); Executive functioning 1 (0.5%); Visual neglect 5 (2.4%); Language deficits 13 (6.3%); Attention and working memory 11 (5.4%).

Supplementary Table 2 Multivariable Linear regression analysis of cognitive domain specific predictors for the Z-scores at follow-up

| Predictor                                            | Episodic memory      |         | Processing speed     |         | Visuoconstruction    |         | Executive functioning |         | Language deficits    |         | Attention and working memory |         |
|------------------------------------------------------|----------------------|---------|----------------------|---------|----------------------|---------|-----------------------|---------|----------------------|---------|------------------------------|---------|
|                                                      | Beta Coefficient (β) | p-value | Beta Coefficient (β) | p-value | Beta Coefficient (β) | p-value | Beta Coefficient (β)  | p-value | Beta Coefficient (β) | p-value | Beta Coefficient (β)         | p-value |
| Z-score at baseline (same domain as outcome)         | 0.653                | <0.001* | 0.827                | <0.001* | 0.471                | <0.001* | 0.591                 | <0.001* | 0.391                | <0.001* | 0.775                        | <0.001* |
| Age at event, year                                   | -                    | -       | 0.002                | 0.916   | -                    | -       | -                     | -       | 0.016                | 0.003*  | -                            | -       |
| Gender <sup>a</sup>                                  | -                    | -       | -                    | -       | -                    | -       | -                     | -       | -                    | -       | -0.075                       | 0.367   |
| Education <sup>b</sup>                               |                      |         |                      |         |                      |         |                       |         |                      |         |                              |         |
| Middle (5)                                           | -0.010               | 0.960   | -0.139               | 0.607   | -0.291               | 0.039*  | -0.070                | 0.632   | -                    | -       | -0.087                       | 0.401   |
| High (6-7)                                           | -0.290               | 0.009*  | -0.135               | 0.205   | -0.186               | 0.047*  | -0.140                | 0.142   | -                    | -       | -0.069                       | 0.401   |
| NIHSS at admission                                   | -0.025               | 0.054   | -0.002               | 0.916   | -                    | -       | -0.007                | 0.430   | -0.016               | 0.065   | -                            | -       |
| NIHSS at discharge                                   | 0.017                | 0.693   | 0.010                | 0.916   | -                    | -       | <-0.001               | 0.997   | -0.009               | 0.631   | -                            | -       |
| CIS-20R - fatigue severity at baseline               | -0.005               | 0.275   | -                    | -       | -                    | -       | -0.005                | 0.156   | -                    | -       | -                            | -       |
| MINI symptoms of depression at baseline <sup>c</sup> | -                    | -       | -                    | -       | -                    | -       | -0.160                | 0.251   | -                    | -       | -                            | -       |
| Lesion location <sup>d</sup>                         |                      |         |                      |         |                      |         |                       |         |                      |         |                              |         |
| Right supratentorial                                 | 0.106                | 0.426   | 0.012                | 0.916   | -                    | -       | -                     | -       | -                    | -       | -                            | -       |
| Bilateral supratentorial                             | -0.015               | 0.960   | 0.049                | 0.916   | -                    | -       | -                     | -       | -                    | -       | -                            | -       |
| Infratentorial                                       | 0.172                | 0.275   | -0.015               | 0.916   | -                    | -       | -                     | -       | -                    | -       | -                            | -       |
| Unilateral supratentorial and infratentorial         | 0.011                | 0.960   | -0.063               | 0.916   | -                    | -       | -                     | -       | -                    | -       | -                            | -       |
| Bilateral supratentorial and infratentorial          | 0.426                | 0.180   | -0.103               | 0.916   | -                    | -       | -                     | -       | -                    | -       | -                            | -       |
| Discharge to <sup>e</sup>                            |                      |         |                      |         |                      |         |                       |         |                      |         |                              |         |
| Clinical rehabilitation                              | -0.253               | 0.219   | -0.146               | 0.647   | -                    | -       | -0.015                | 0.978   | -                    | -       | 0.003                        | 0.962   |
| Outpatient rehabilitation                            | -0.076               | 0.693   | -0.059               | 0.916   | -                    | -       | 0.029                 | 0.898   | -                    | -       | 0.075                        | 0.401   |
| Nursing home                                         | NA                   | NA      | NA                   | NA      | -                    | -       | NA                    | NA      | -                    | -       | -1.372                       | 0.016*  |
| Different                                            | -0.540               | 0.140   | -0.124               | 0.916   | -                    | -       | -0.305                | 0.251   | -                    | -       | -0.146                       | 0.401   |
| Lesion Volume on MRI, mL                             | -                    | -       | <-0.001              | 0.916   | -                    | -       | -                     | -       | -                    | -       | -                            | -       |
| <b>Adjusted R-squared</b>                            | 0.478                |         | 0.754                |         | 0.216                |         | 0.487                 |         | 0.274                |         | 0.595                        |         |

Education category 5, i.e. middle school/ secondary vocational training. NIHSS: National Institutes of Health Stroke scale; CIS-20R: Checklist Individual Strength; MINI: Mini International Neuropsychiatric Interview.<sup>a</sup> Reference category Gender: Male.<sup>b</sup> Reference category Education level: Low(1-4).<sup>c</sup> Reference category MINI symptoms of depression: No.<sup>d</sup> Reference category Lesion location: Left supratentorial.<sup>e</sup> Reference category Discharge to: Home. Variables that were not statistically significant in univariable analysis were excluded from the multivariable regression model and are represented as '-' in the table. Variables that were

not statistically significant in any univariable analysis were omitted from the table.  
Numbers with \* and bold indicates significant p-values after FDR-correction.
